# Supplementary material for: Characterization and Classification of Spanish Honey by Non-Targeted LC–HRMS (Orbitrap) Fingerprinting and Multivariate Chemometric Methods
Source: MDPI journal article supplement (doi:10.3390/molecules27238357), 2022-11-30
Supplement: s1 [file s1]

# Characterization and Classification of Spanish Honey by Non-targeted LC-HRMS (Orbitrap) Fingerprinting and Multivariate Chemometric Methods

Víctor García-Seval <sup>1</sup>, Javier Saurina <sup>1,2</sup>, Sònia Sentellas <sup>1,2,3</sup> and Oscar Núñez <sup>1,2,3,\*</sup>

<sup>1</sup> Department of Chemical Engineering and Analytical Chemistry, University of Barcelona. Martí i Franquès 1-11, E08028, Barcelona, Spain

<sup>2</sup> Research Institute in Food Nutrition and Food Safety, University of Barcelona, Recinte Torribera, Av. Prat de la Riba 171, Edifici de Recerca (Gaudi), Santa Coloma de Gramenet, E08921 Barcelona, Spain.

<sup>3</sup> Serra Hünter Fellow, Generalitat de Catalunya, Via Laietana 2, E-08003 Barcelona, Spain.

\* Correspondence: O.N.: [oscar.nunez@ub.edu](mailto:oscar.nunez@ub.edu)

**Table S1.** Multiclass predictions by cross-validation for the set of honeydew-honey samples using 3 LVs. HO: Holm oak; MO: Mountain; and FO: Forest.

| Sample class variety | Sensitivity (%) | Specificity (%) | Classification Error (%) |
|----------------------|-----------------|-----------------|--------------------------|
| HO                   | 100             | 100             | 0                        |
| MO                   | 100             | 100             | 0                        |
| FO                   | 100             | 100             | 0                        |

**Table S2.** Number of analyzed honey samples considering botanical varieties and geographical origins.

| Honey           | Botanical variety         | Number of samples | Geographical origin           | Number of samples |
|-----------------|---------------------------|-------------------|-------------------------------|-------------------|
| Blossom-honeys  | Orange/Lemon Blossom (BL) | 12                | Aragon                        | 1                 |
|                 |                           |                   | Balearic Islands              | 2                 |
|                 |                           |                   | Cantabria                     | 1                 |
|                 |                           |                   | Castile and Leon              | 2                 |
|                 |                           |                   | Catalonia                     | 3                 |
|                 |                           |                   | Extremadura                   | 1                 |
|                 |                           |                   | Spain <sup>a</sup>            | 2                 |
|                 | Eucalyptus (EU)           | 13                | Andalusia                     | 1                 |
|                 |                           |                   | Asturias                      | 2                 |
|                 |                           |                   | Cantabria                     | 1                 |
|                 |                           |                   | Castile and Leon              | 2                 |
|                 |                           |                   | Catalonia                     | 1                 |
|                 |                           |                   | Extremadura                   | 4                 |
|                 |                           |                   | Navarre                       | 1                 |
|                 |                           |                   | Spain and others <sup>a</sup> | 1                 |
|                 | Rosemary (RO)             | 26                | Andalusia                     | 1                 |
|                 |                           |                   | Aragon                        | 4                 |
|                 |                           |                   | Asturias                      | 1                 |
|                 |                           |                   | Balearic Islands              | 4                 |
|                 |                           |                   | Castile and Leon              | 1                 |
|                 |                           |                   | Cantabria                     | 2                 |
|                 |                           |                   | Catalonia                     | 6                 |
|                 |                           |                   | Extremadura                   | 4                 |
|                 | Thyme (TH)                | 7                 | Navarre                       | 1                 |
|                 |                           |                   | Spain <sup>a</sup>            | 2                 |
|                 |                           |                   | Castile and Leon              | 1                 |
|                 |                           |                   | Castile La Mancha             | 2                 |
|                 | Heather (HE)              | 18                | Catalonia                     | 1                 |
|                 |                           |                   | Extremadura                   | 2                 |
|                 |                           |                   | Spain <sup>a</sup>            | 1                 |
|                 |                           |                   | Asturias                      | 2                 |
|                 |                           |                   | Basque Country                | 1                 |
|                 |                           |                   | Cantabria                     | 3                 |
| Honeydew-honeys | Mountain (MO)             | 6                 | Castile and Leon              | 5                 |
|                 |                           |                   | Catalonia                     | 2                 |
|                 |                           |                   | Extremadura                   | 5                 |
|                 |                           |                   | Spain <sup>a</sup>            | 1                 |
|                 | Forest (FO)               | 10                | Castile and Leon              | 1                 |
|                 |                           |                   | Castile La Mancha             | 1                 |
|                 |                           |                   | Catalonia                     | 2                 |
|                 |                           |                   | Balearic Islands              | 2                 |
|                 |                           |                   | Cantabria                     | 2                 |
|                 | Holm Oak (HO)             | 10                | Castile and Leon              | 1                 |
|                 |                           |                   | Catalonia                     | 1                 |
|                 |                           |                   | Spain <sup>a</sup>            | 4                 |
| Other honeys    | Multifloral (MF)          | 34                | Aragon                        | 2                 |
|                 |                           |                   | Castile and Leon              | 2                 |
|                 |                           |                   | Extremadura                   | 6                 |
|                 |                           |                   | Asturias                      | 1                 |
|                 |                           |                   | Balearic Islands              | 4                 |
|                 |                           |                   | Cantabria                     | 1                 |
|                 |                           |                   | Castile and Leon              | 7                 |
|                 |                           |                   | Castile La Mancha             | 2                 |
|                 |                           |                   | Catalonia                     | 8                 |
|                 |                           |                   | Extremadura                   | 4                 |
|                 |                           |                   | Navarre                       | 4                 |
|                 |                           |                   | Spain <sup>a</sup>            | 1                 |
|                 |                           |                   | Spain and others <sup>a</sup> | 2                 |

<sup>a</sup> Spain: Honeys produced in Spain but geographical region not specified; Spain and others: Honeys that include mixtures of honey produced in Spain and other countries such as Uruguay, Cuba, Mexico, Romania or Ukraine

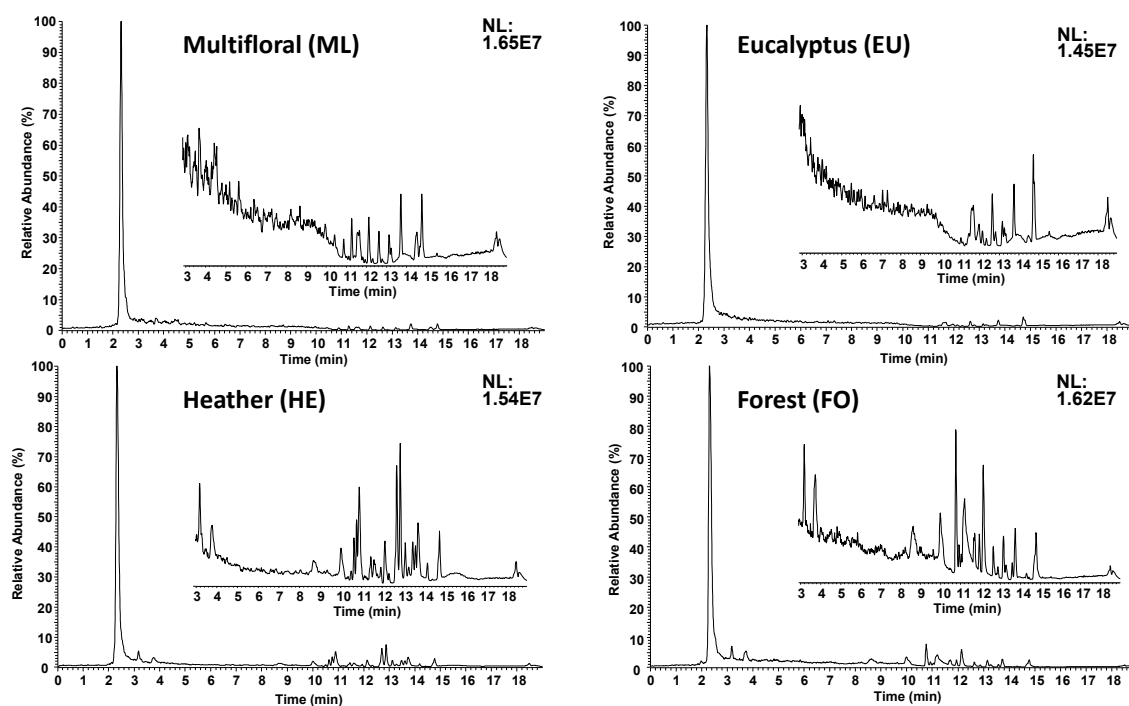

**Figure S1.** Non-targeted LC-HRMS (base peak chromatogram) fingerprints obtained for multifloral, eucalyptus, heather, and forest honeys.

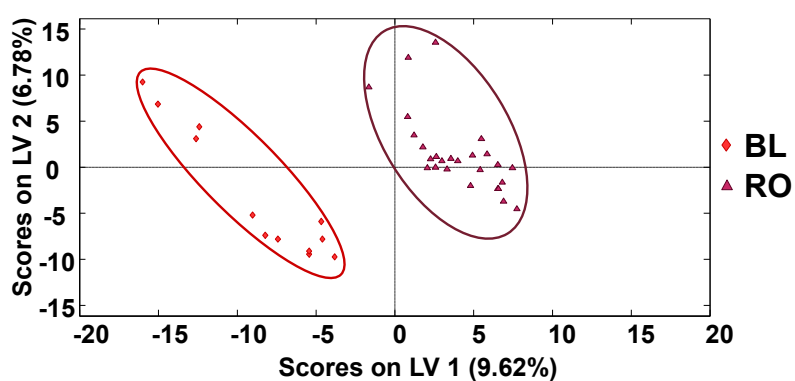

**Figure S2.** Supervised PLS-DA score plots of LV1 *vs.* LV2 when using non-targeted LC-HRMS fingerprints as honey chemical descriptors of orange/lemon blossom (BL) *vs.* rosemary (RO) blossom honeys (2 LVs were used to build the model).

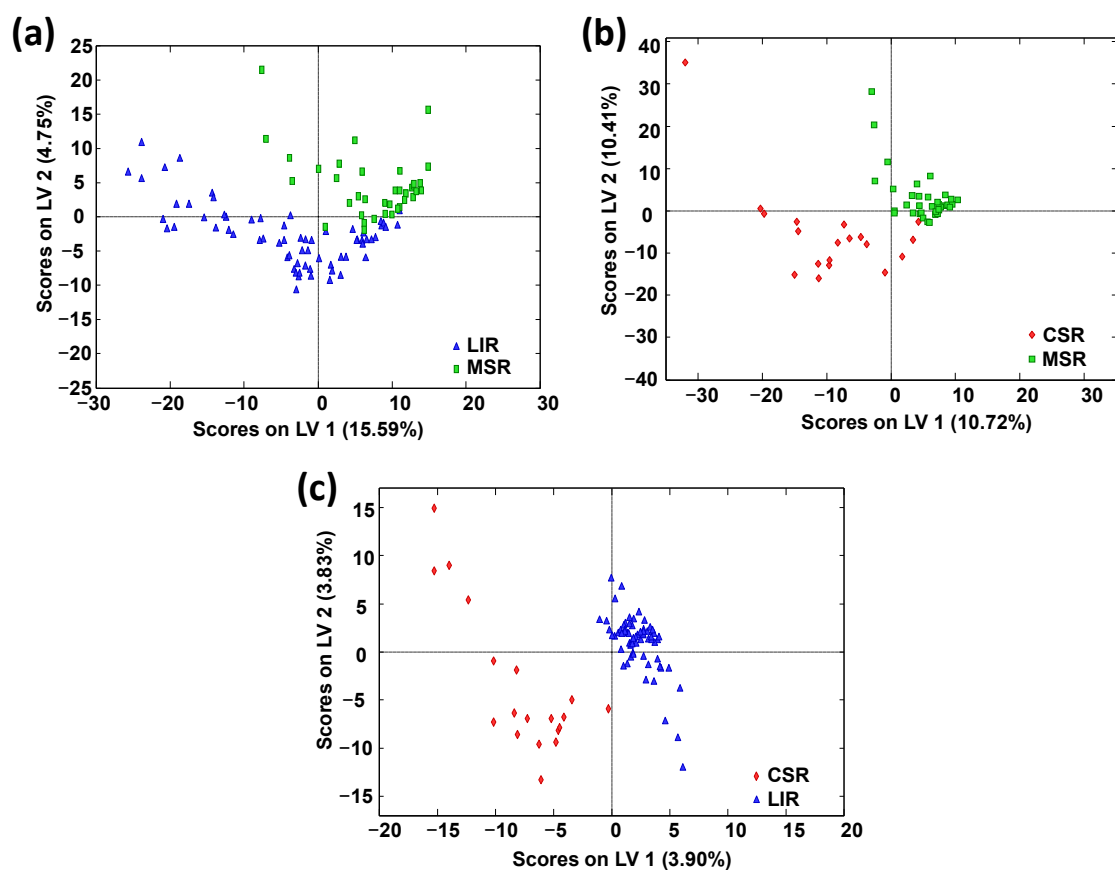

**Figure S3.** Paired PLS-DA score plots of LV1 vs. LV2 when using non-targeted LC-HRMS fingerprints as honey chemical descriptors of climatic geographical production region. (a) LIR *vs.* MSR (3 LVs were used to build the model), (b) CSR *vs.* MSR (2 LVs were used to build the model), and (c) CSR *vs.* LIR (2 LVs were used to build the model). CSR: Cantabrian Sea region; LIR: Landlock Inland region; MSR: Mediterranean Sea region.
